# Supplementary material for: Social, Organizational, and Technological Factors Impacting Clinicians’ Adoption of Mobile Health Tools: Systematic Literature Review
Source: PubMed Central journal article supplement (PMC7059085; doi:10.2196/15935), 2020-02-20
Supplement: mhealth_v8i2e15935_app4.pdf [file mhealth_v8i2e15935_app4.pdf]

## Phases of thematic analysis after Braun & Clarke

---

|                                                                      |                                                                                                                                                                                                                                                  |
|----------------------------------------------------------------------|--------------------------------------------------------------------------------------------------------------------------------------------------------------------------------------------------------------------------------------------------|
| <b>Familiarizing yourself with your data</b>                         | Transcribing data, reading and re-reading the data, noting down initial ideas.                                                                                                                                                                   |
| <b>Generating initial codes</b>                                      | Coding interesting features of the data in a systematic fashion across the entire data set, collating data relevant to each code.                                                                                                                |
| <b>Searching for themes</b>                                          | Collating codes into potential themes, gathering all data relevant to each potential theme.                                                                                                                                                      |
| <b>Reviewing themes</b>                                              | Checking if the themes work in relation to the coded extracts (Level 1) and the entire data set (Level 2), generating a thematic 'map' of the analysis.                                                                                          |
| <b>Defining and naming themes</b>                                    | On-going analysis to refine the specifics of each theme, and the overall story the analysis tells, generating clear definitions and names for each theme.                                                                                        |
| <b>Linking themes to explanatory frameworks, models and concepts</b> | Making a contribution to theory, reflecting on the validity of different sociomaterial approaches. Building new approaches and theoretical categories and concepts.                                                                              |
| <b>Producing the report</b>                                          | The final opportunity for analysis. Selection of a vivid, compelling extract examples, final analysis of selected extracts, relating back of the analysis to the research question and literature, producing a scholarly report of the analysis. |

---

Source: After (Braun & Clarke, 2006, S. 87).
